# Supplementary material for: Androgenic anabolic steroid-induced liver injury: two case reports assessed for causality by the updated Roussel Uclaf Causality Assessment Method (RUCAM) score and a comprehensive review of the literature
Source: PubMed Central journal article supplement (PMC7678230; doi:10.1136/bmjgast-2020-000549), 2020-11-19
Supplement: bmjgast-2020-000549supp001.pdf [file bmjgast-2020-000549supp001.pdf]

Supplemental Table 1: Clinical and biochemical data for all included cases

|  | Case no. | Country   | Age | Sex | AAS taken                                                                                                  | Clinical presentation                              | Time from starting AAS to presentation (days) | Time from stopping AAS to peak Bili (Days) | R Value | Pattern of liver injury | Updated RUCAM score & Causality grading | Peak Bili (umol/L) | peak ALT (IU/L) | Peak ALP (IU/L) | Peak Cr (umol/L) | Time to resolution from peak Bili (days) | Primary therapy | Other therapies                       |
|--|----------|-----------|-----|-----|------------------------------------------------------------------------------------------------------------|----------------------------------------------------|-----------------------------------------------|--------------------------------------------|---------|-------------------------|-----------------------------------------|--------------------|-----------------|-----------------|------------------|------------------------------------------|-----------------|---------------------------------------|
|  | 1        | UK        | 62  | M   | Stanozol                                                                                                   | Jaundice and pruritis, weight loss                 | 210                                           |                                            | 0.92    | cholestatic or mixed    | 6- Probable                             | 156                | 51              |                 |                  | 105                                      | Nil             |                                       |
|  | 2        | UK        | 65  | F   | Stanozol                                                                                                   | Jaundice and pruritis                              | 120                                           |                                            | 1.48    | cholestatic or mixed    | 6- Probable                             | 660                | 140             | 284             | 404              | 135                                      | Nil             |                                       |
|  | 3        | UK        | 62  | F   | Stanozol                                                                                                   | Jaundice and pruritis                              | 150                                           |                                            | 0.31    | cholestatic or mixed    | 6- Probable                             | 732                |                 | 534             | 133              | 135                                      | Nil             |                                       |
|  | 4        | UK        | 65  | M   | Stanozol                                                                                                   | Jaundice and pruritis                              | 40                                            |                                            | 0.58    | cholestatic or mixed    | 7- Probable                             | 798                |                 | 360             | 1021             | 135                                      | Nil             |                                       |
|  | 5        | US        | 18  | M   | Beastrodol 40mg                                                                                            | jaundice, vomiting, difficulty concentrating       | 14                                            | 28                                         | 7.31    | Hepatocellular          | 6- Probable                             | 658                | 229             | 218             |                  | 90                                       | UDCA            | Colestyramine, Rifampicin             |
|  | 6        | US        | 26  | M   | Mutant Plexx, Methylstenbolone, Epistan, Halodrol, 13-ethyl-3-methoxy-gona-2,5(10)-diene-17-one (Max LMG). | Jaundice and pruritis                              | 120                                           | 14                                         | 5.58    | Hepatocellular          | 3- Possible                             | 84                 | 223             |                 |                  | 90                                       | nil             |                                       |
|  | 7        | US        | 45  | M   | Oxandrolone 50mg OD and testosterone inj weekly                                                            | Jaundice and pruritis                              | 104                                           | 25                                         | 1.85    | cholestatic or mixed    | 3- Possible                             | 109                | 162             | 286             |                  |                                          | nil             |                                       |
|  | 8        | Spain     | 29  | M   | Epithiostanol                                                                                              | Jaundice and pruritis                              | 30                                            | 30                                         | 4.30    | cholestatic or mixed    | 6-8 Probable                            | 1060               | 169             | 248             | 177              | 120                                      | MARS            | Standard medical therapy              |
|  | 9        | Spain     | 20  | M   | Epithiostanol                                                                                              | Jaundice and pruritis                              | 33                                            | 30                                         | 5.43    | Hepatocellular          | 6- Probable                             | 968                | 344             | 292             | 203              | 120                                      | MARS            | Standard medical therapy              |
|  | 10       | Spain     | 23  | M   | Epithiostanol                                                                                              | Jaundice and pruritis                              | 31                                            | 30                                         | 1.36    | cholestatic or mixed    | 6- Probable                             | 860                | 109             | 248             |                  | 120                                      | MARS            | Standard medical therapy              |
|  | 11       | Spain     | 26  | M   | Epithiostanol                                                                                              | Jaundice and pruritis                              | 30                                            | 30                                         | 2.59    | cholestatic or mixed    | 6- Probable                             | 694                | 300             | 347             | 124              | 120                                      | MARS            | Standard medical therapy              |
|  | 12       | Australia | 46  | M   | Stanozol 40mg, Methandrostenal-one 40mg                                                                    | Jaundice and pruritis                              | 210                                           |                                            | 1.27    | cholestatic or mixed    | 3- Possible                             | 302                | 125             | 295             |                  | 49                                       | UDCA            |                                       |
|  | 13       | US        | 26  | M   | methyl-1-etiobenolol-epietiocholanolone                                                                    | Jaundice and pruritis                              |                                               | 14                                         | 2.65    | cholestatic or mixed    | 4- Possible                             | 616                | 106             |                 |                  | 60                                       | MARS            | Standard medical therapy              |
|  | 14       | UK        | 25  | M   | Methyldrostanol-one                                                                                        | jaundice, lethargy anorexia                        | 49                                            | 42                                         | 4.53    | cholestatic or mixed    | 4- Possible                             | 614                | 207             | 137             |                  | 105                                      | nil             |                                       |
|  | 15       | UK        | 45  | M   | Methyldrostanol-one                                                                                        | Jaundice and pruritis abdo pain                    | 56                                            | 63                                         | 1.76    | cholestatic or mixed    | 5- Possible                             | 229                | 152             | 259             | 173              |                                          | nil             |                                       |
|  | 16       | UK        | 32  | M   | Methandrostenolone 5mg                                                                                     | Jaundice, nausea and vomiting                      | 60                                            | 4                                          | 0.87    | cholestatic or mixed    | 6- Probable                             | 800                | 76              | 262             |                  | 90                                       | UDCA            | Chlorphenamin and Colestyramine       |
|  | 17       | UK        | 16  | M   | Methandrostenolone 10mg TDS                                                                                | Jaundice, pruritis, abdo pain, nausea              | 27                                            | 7                                          | 2.31    | cholestatic or mixed    | 6- Probable                             | 635                | 156             | 203             |                  | 120                                      | UDCA            | colestyramine, Rifampicin, naltrexone |
|  | 18       | US        | 23  | M   | Methasterone (Superdrol) 10mg then 20mg                                                                    | Jaundice, pruritis, abdo pain, nausea and vomiting | 74                                            | 28                                         | 1.25    | cholestatic or mixed    | 6- Probable                             | 718                | 93              | 280             | 301              | 75                                       | UDCA 1.2g       | Hydroxyzine                           |

|                                          |    |        |    |   |                                                                            |                                                              |     |    |      |                      |             |      |     |     |     |                    |                                                                            |                          |
|------------------------------------------|----|--------|----|---|----------------------------------------------------------------------------|--------------------------------------------------------------|-----|----|------|----------------------|-------------|------|-----|-----|-----|--------------------|----------------------------------------------------------------------------|--------------------------|
| Kafrouni MI, 2007 <sup>12</sup>          | 19 | US     | 40 | M | Methasterone (Superdrol) 20mg                                              | Jaundice pruritis and weight loss                            | 110 | 42 | 2.17 | cholestatic or mixed | 4- Possible | 855  | 301 | 416 |     |                    | Prednisolone 40mg - 1 week, UDCA for pruritis                              |                          |
| Kafrouni MI, 2007 <sup>12</sup>          | 20 | US     | 31 | M | Methasterone (Superdrol) and Halodrol                                      | Jaundice, weakness and flu like Sx, Pruritis and weight loss | 56  | 35 | 0.47 | cholestatic or mixed | 6- Probable | 747  | 59  | 375 | 105 | UDCA               | colestyramine, hydroxyzine, rifampicin                                     |                          |
| Anand JS, 2006 <sup>13</sup>             | 21 | Poland | 21 | M | Trenbolone                                                                 | Jaundice and pruritis                                        | 49  |    | 3.18 | cholestatic or mixed | 5- Possible | 1120 | 106 |     | 60  | UDCA but then MARS | Topical steroids, phenobarbital                                            |                          |
| Krishnan PV, 2009 <sup>14</sup>          | 22 | US     | 21 | M | Methasterone (Superdrol)                                                   | Jaundice, pruritis, nausea and anorexia                      |     | 21 | 3.07 | cholestatic or mixed | 5- Possible | 665  | 256 |     | 90  | Prednisolone 40mg  |                                                                            |                          |
| Krishnan PV, 2009 <sup>14</sup>          | 23 | US     | 30 | M | Dehydroepiandrosterone                                                     | Jaundice and pruritis                                        | 35  |    | 5.77 | Hepatocellular       | 3- Possible | 137  | 200 |     | 90  |                    | Hydroxyzine and colestyramine                                              |                          |
| Krishnan PV, 2009 <sup>14</sup>          | 24 | US     | 38 | M | 17a-methyl-etioallocholan-2-ene-17b-01                                     | Jaundice, pruritis lethargy, nausea and weight loss          | 98  | 53 | 2.84 | cholestatic or mixed | 3- Possible | 920  | 467 |     | 212 | 75                 | UDCA then Prednisolone 40mg added 3 weeks later for 'unremitting jaundice' | Hydroxyzine              |
| Magee CD, 2016 <sup>15</sup>             | 25 | US     | 29 | M | Methasterone, Stenbolone, desoxymethyltestosterone                         | Jaundice and fatigue                                         | 70  | 10 | 3.33 | cholestatic or mixed | 6- Probable | 340  | 112 | 101 | 56  |                    |                                                                            |                          |
| Hymel BM, 2013 <sup>16</sup>             | 26 | US     | 26 | M | Mastabol (17 beta-Hydroxy-2alpha-methyl-5alpha-androstan-3-one propionate) | Jaundice, pruritis weight loss                               | 41  |    | 0.80 | cholestatic or mixed | 6- Probable | 404  | 117 | 441 |     |                    | Phenobarbital                                                              |                          |
| NASR J, 2009 <sup>17</sup>               | 27 | US     | 42 | M | Methasterone (Superdrol)                                                   | Jaundice, pruritis weight loss                               | 84  |    | 0.83 | cholestatic or mixed | 5- Possible | 705  | 98  | 353 | 318 | 120                | UDCA 1.2g                                                                  | Hydroxyzine, naltrexone  |
| Rosenfeld GA, 2011 <sup>18</sup>         | 28 | Canada | 50 | M | Methandrostenolone 10mg BD 3 weeks, TDS 5 weeks                            | Jaundice , abdo pain, weight loss                            | 56  | 6  | 1.09 | cholestatic or mixed | 5- Possible | 937  | 64  | 206 | 299 |                    |                                                                            | Standard medical therapy |
| Yoshida EM, 1994 <sup>19</sup>           | 29 | Canada | 26 | M | Stanozolol 125mg im twice weekly                                           | Jaundice, nausea and vomiting, malaise                       | 56  | 28 | 0.72 | cholestatic or mixed | 4- Possible | 876  |     | 369 | 418 | 150                |                                                                            | Standard medical therapy |
| Shah NL, 2008 <sup>20</sup>              | 30 | US     | 33 | M | Methasterone                                                               | Jaundice, pruritis, loss of appetite, malaise                |     | 39 | 0.23 | cholestatic or mixed | 3- Possible | 790  | 102 | 474 | 203 | 120                | nil                                                                        |                          |
| Shah NL, 2008 <sup>20</sup>              | 31 | US     | 28 | M | Methasterone                                                               | Jaundice, pruritis lethargy abdo pain                        | 120 | 30 | 1.62 | cholestatic or mixed | 7- Probable | 872  | 99  | 217 | 407 | 60                 | nil                                                                        |                          |
| Shah NL, 2008 <sup>20</sup>              | 32 | US     | 25 | M | Methasterone                                                               | Jaundice, pruritis, lethargy, abdo pain, diarrhoea           | 42  | 30 | 1.72 | cholestatic or mixed | 5- Possible | 599  | 289 | 182 |     | 60                 | nil                                                                        |                          |
| <sup>2</sup> Shah NL, 2008 <sup>20</sup> | 33 | US     | 20 | M | Methasterone                                                               | Jaundice pruritis, malaise, anorexia constipation            | 42  | 32 | 4.27 | cholestatic or mixed | 6- Probable | 547  | 554 | 184 |     | 60                 | nil                                                                        |                          |

|                                      |    |         |    |   |                                                                                       |                                                     |     |    |       |                      |             |      |     |     |     |     |                                                             |                                                        |
|--------------------------------------|----|---------|----|---|---------------------------------------------------------------------------------------|-----------------------------------------------------|-----|----|-------|----------------------|-------------|------|-----|-----|-----|-----|-------------------------------------------------------------|--------------------------------------------------------|
| Shah NL, 2008 <sup>20</sup>          | 34 | US      | 21 | M | Methasterone                                                                          | Jaundice, abdo pain, weight loss, anorexia, malaise | 42  | 28 | 2.29  | cholestatic or mixed | 5- Possible |      | 58  | 170 |     | 105 | nil                                                         |                                                        |
| Sanchez-Osorio M, 2008 <sup>21</sup> | 35 | Spain   | 29 | M | Mesterolone, testosterone udecanoate, nandrolone, oxymethoone, stanozol, testosterone | Jaundice, pruritis, abdo pain, weight loss          | 105 | 5  | 1.02  | cholestatic or mixed | 8- Probable | 581  | 54  | 694 |     | 150 | UDCA                                                        |                                                        |
| Singh V, 2009 <sup>22</sup>          | 36 | US      | 51 | M | Methasterone (Superdrol) dehydroepiandrosterone.                                      | Jaundice                                            | 42  | 35 | 29.01 | Hepatocellular       | 4- Possible | 872  | 172 | 106 |     | 150 | UDCA                                                        | Colestyramine, UDCA, Hydroxyzine, Plasmaphoresis       |
| Singh V, 2009 <sup>22</sup>          | 37 | US      | 25 | M | Methasterone (Superdrol) 2 pills per day for 2 months, Aminovol, ergomax              | Jaundice and pruritis                               | 60  | 28 | 6.38  | Hepatocellular       | 5- Possible | 923  | 236 | 111 |     | 60  | nil                                                         | Zolpidem, doxepin, Colestyramine, Rifampicin           |
| Singh V, 2009 <sup>22</sup>          | 38 | US      | 33 | M | Methasterone (Superdrol) 10mg TDS for 3 weeks                                         | Jaundice and pruritis                               | 35  | 14 | 1.73  | cholestatic or mixed | 6- Probable |      | 69  |     |     | 120 | nil                                                         |                                                        |
| Stepien PM, 2009 <sup>23</sup>       | 39 | Poland  | 19 | M | Stanozol 50mg im alt days                                                             | Jaundice, pruritis, malaise                         | 60  | 21 | 2.45  | cholestatic or mixed | 6- Probable |      | 135 | 77  | 141 | 135 | initially UDCA and LOLA then due to failure hydrocortisone. |                                                        |
| Wree A, 2011 <sup>24</sup>           | 40 | Germany | 46 | M | ?                                                                                     |                                                     |     |    | 0.00  | cholestatic or mixed | 4- Possible | 547  | 66  | 403 |     |     | UDCA 750 and Pred 50mg 3d                                   |                                                        |
| Wree A, 2011 <sup>24</sup>           | 41 | Germany | 22 | M | ?                                                                                     |                                                     |     |    | 0.00  | cholestatic or mixed | 4- Possible | 410  | 52  |     |     |     | UDCA 1500, Pred 1g 3d                                       |                                                        |
| Wree A, 2011 <sup>24</sup>           | 42 | Germany | 22 | M | ?                                                                                     |                                                     |     |    | 0.00  | cholestatic or mixed | 4- Possible | 650  | 67  |     |     |     | UDCA 1500, Pred 1g 3d                                       |                                                        |
| Wree A, 2011 <sup>24</sup>           | 43 | Germany | 24 | M | ?                                                                                     |                                                     |     |    | 0.00  | cholestatic or mixed | 4- Possible | 1163 | 53  |     |     |     | UDCA 750, Pred 250mg 3d                                     |                                                        |
| Wree A, 2011 <sup>24</sup>           | 44 | Germany | 26 | M | ?                                                                                     |                                                     |     |    | 0.00  | cholestatic or mixed | 4- Possible | 1180 | 59  |     |     |     | UDCA 750, Pred 250mg 3d                                     |                                                        |
| Flores A, 2016 <sup>25</sup>         | 45 | US      | 31 | M | Promagnon and Epiotostanoll                                                           | Pruritis, jaundice, AKI mild confusion              |     |    | 0.00  | cholestatic or mixed | 3- Possible | 906  |     |     |     |     |                                                             | Hydroxyzine, Colestyramine, UDCA, sertraline, naloxone |
| El Khoury, 2017 <sup>26</sup>        | 46 | Lebanon | 35 | M | Stanozol, Trenbolone, testosterone propionate                                         | Jaundice, Pruritis, Abdo pain and vomiting          |     |    | 8.28  | Hepatocellular       | 3- Possible | 549  | 450 | 329 |     |     | UDCA                                                        | Hydroxyzine                                            |
| Luciano RL, 2014 <sup>27</sup>       | 47 | US      | 41 | M | Nandrolone, Testosterone, methandrostenol-one                                         | Jaundice, Pruritis, malaise, weight loss            |     | 52 | 6.68  | Hepatocellular       | 2- Unlikely | 819  | 267 |     |     |     | UDCA                                                        | Hydroxyzine, Colestyramine                             |
| Tabatabaee SM, 2015 <sup>28</sup>    | 48 | Iran    | 30 | M | Stanozol                                                                              | Jaundice, nausea, malaise                           |     | 0  | 0.19  | cholestatic or mixed | 4- Possible | 821  | 33  | 535 |     |     | nil specified                                               | Haemodialysis                                          |
| Tabatabaee SM, 2015 <sup>28</sup>    | 49 | Iran    | 43 | M | Stanozol                                                                              | Jaundice                                            |     | 36 | 0.29  | cholestatic or mixed | 4- Possible | 992  | 66  | 690 |     |     |                                                             | Haemodialysis                                          |

|                               |          |                                                                                  |            |               |                                                                                                                                                                                                                                                                                                                                                                                                                                                                                                |                                      |                                                      |                                                   |                |                                                          |                                                                         |                           |                        |                        |                       |                                                 |                                                                                                                |                            |
|-------------------------------|----------|----------------------------------------------------------------------------------|------------|---------------|------------------------------------------------------------------------------------------------------------------------------------------------------------------------------------------------------------------------------------------------------------------------------------------------------------------------------------------------------------------------------------------------------------------------------------------------------------------------------------------------|--------------------------------------|------------------------------------------------------|---------------------------------------------------|----------------|----------------------------------------------------------|-------------------------------------------------------------------------|---------------------------|------------------------|------------------------|-----------------------|-------------------------------------------------|----------------------------------------------------------------------------------------------------------------|----------------------------|
| Viella AL, 2013 <sup>29</sup> | 50       | US                                                                               | 50         | M             | Incredible Bulk and Spartan 45( $\alpha$ -methyl- $\beta$ -etioallocholan-2-ene-17 $\beta$ -ol 15 mg, 2 $\alpha$ ,3 $\alpha$ -epithio-17 $\alpha$ -methyl- $\beta$ -etioallocho-<br>lanol 10 mg, and Bulgarian Tribulus Terrestris extract 300 mg; Spartan 45 : 4-chloro-17 $\alpha$ -methyl-androst-4-ene-3,17 $\beta$ -diol 15 mg, 2 $\alpha$ , METHASTERONE 17 $\alpha$ -dimethyl-17 $\beta$ -hydroxy-5 $\alpha$ -androstane-3-one 15 mg, and 13-ethyl-3-methoxy-gona-2,5(10)-diene-17-one) | Jaundice, diarrhoea                  | 60                                                   | 9                                                 | 2.34           | cholestatic or mixed                                     | 4- Possible                                                             | 535                       | 125                    | 180                    |                       | 105                                             | Prednisolone short course then UDCA added                                                                      | Colestyramine, Hydroxyzine |
| Abeles RD                     | 51       | UK                                                                               | 30         | M             | Superdrol                                                                                                                                                                                                                                                                                                                                                                                                                                                                                      | Jaundice, malaise, diarrhoea         | 42                                                   | 21                                                | 11.68          | Hepatocellular                                           | 4- Possible                                                             | 633                       | 257                    | 123                    | 122                   | 90                                              | Prednisolone 60mg then 40mg                                                                                    |                            |
| Abeles RD                     | 52       | UK                                                                               | 39         | M             | Methandienone (Xyenobol Dianabol10mg )                                                                                                                                                                                                                                                                                                                                                                                                                                                         | Jaundice, abdo pain pruritis malaise | 56                                                   | 53                                                | 6.30           | Hepatocellular                                           | 4- Possible                                                             | 768                       | 460                    | 603                    | 166                   | 76                                              | NAC initially for 5 days, no response, UDCA 750 no response. Pred 40mg started response but less then regained | Antihistamines             |
| <b>Summary stats</b>          | <b>N</b> | <b>Region</b>                                                                    | <b>Age</b> | <b>Sex</b>    | <b>AAS taken</b>                                                                                                                                                                                                                                                                                                                                                                                                                                                                               | <b>Clinical presentation</b>         | <b>Time from starting AAS to presentation (days)</b> | <b>Time from stopping AAS to peak Bili (Days)</b> | <b>R Value</b> | <b>Pattern of liver injury</b>                           | <b>Updated RUCAM score &amp; Causality grading</b>                      | <b>Peak Bili (umol/L)</b> | <b>peak ALT (IU/L)</b> | <b>Peak ALP (IU/L)</b> | <b>Peak Cr umol/L</b> | <b>Time to resolution from peak Bili (days)</b> | <b>Primary therapy</b>                                                                                         | <b>Other therapies</b>     |
| Median                        | 52 cases | North America 23 (44%)<br>Europe 25 (48%)<br>Mid east 3 (6%)<br>Australia 1 (2%) | 29         | Male 50 (96%) |                                                                                                                                                                                                                                                                                                                                                                                                                                                                                                |                                      | 56                                                   | 28                                                | 2.0            | Hepatocellular 10 (19%)<br>cholestatic or mixed 42 (81%) | Median 5.0<br>Unlikely 1 (2%)<br>Possible 31 (60%)<br>Probable 20 (38%) | 705                       | 125                    | 190                    | 203                   | 90                                              |                                                                                                                |                            |
| 25th Percentile               |          |                                                                                  | 24         |               |                                                                                                                                                                                                                                                                                                                                                                                                                                                                                                |                                      | 41.5                                                 | 14                                                | 0.8            |                                                          | 4.0                                                                     | 549                       | 71                     | 123                    | 167                   | 75                                              |                                                                                                                |                            |
| 75th percentile               |          |                                                                                  | 38         |               |                                                                                                                                                                                                                                                                                                                                                                                                                                                                                                |                                      | 72                                                   | 35                                                | 4.3            |                                                          | 6.0                                                                     | 872                       | 234                    | 287                    | 300                   | 120                                             |                                                                                                                |                            |

AAS Androgenic Anabolic Steroid, Bili Bilirubin, ALT Alanine Amino-Transferase, ALP Alkaline Phosphatase, Cr Creatinine, UDCA Ursodeoxycholic Acid, MARS Molecular Adsorbent Recirculating System, LOLA L-Ornithine L-Aspartate, NAC N-Acetyl Cysteine.

R Value calculated (ALT/ULN ALT)/(ALP/ULN ALP), if no ALP available then assumed to be 1. RUCAM Roussel Uclaf Causality Assessment Method

1. Slater SD, Davidson JF, Patrick RS. Jaundice induced by stanozolol hypersensitivity. *Postgrad Med J* 1976;52:229-32.
2. Evely RS, Triger DR, Milnes JP, Low-Beer TS, Williams R. Severe cholestasis associated with stanozolol. *Br Med J (Clin Res Ed)* 1987;294:612-3.
3. Awai HI, Yu EL, Ellis LS, Schwimmer JB. Liver toxicity of anabolic androgenic steroid use in an adolescent with nonalcoholic fatty liver disease. *J Pediatr Gastroenterol Nutr* 2014;59:e32-3.
4. Brazeau MJ, Castaneda JL, Huitron SS, Wang J. A Case Report of Supplement-Induced Hepatitis in an Active Duty Service Member. *Mil Med* 2015;180:e844-6.
5. Cabb E, Baltar S, Powers DW, Mohan K, Martinez A, Pitts E. The Diagnosis and Manifestations of Liver Injury Secondary to Off-Label Androgenic Anabolic Steroid Use. *Case Rep Gastroenterol* 2016;10:499-505.
6. Diaz FC, Saez-Gonzalez E, Benlloch S, et al. Albumin dialysis with MARS for the treatment of anabolic steroid-induced cholestasis. *Ann Hepatol* 2016;15:939-43.
7. Ding NS, De Cruz P, Lim L, Thompson A, Desmond P. Androgenic-anabolic steroid drug-induced liver injury. *Intern Med J* 2013;43:215-6.
8. Eapen J, Ayoola R, Subramanian RM. 'The efficacy of extracorporeal liver support with molecular adsorbent recirculating system in severe drug-induced liver injury'. *Oxf Med Case Reports* 2018;2018:omx077.
9. El Sherrif Y, Potts JR, Howard MR, et al. Hepatotoxicity from anabolic androgenic steroids marketed as dietary supplements: contribution from ATP8B1/ABCB11 mutations? *Liver Int* 2013;33:1266-70.
10. Elsharkawy AM, McPherson S, Masson S, Burt AD, Dawson RT, Hudson M. Cholestasis secondary to anabolic steroid use in young men. *BMJ* 2012;344:e468.
11. Jasiurkowski B, Raj J, Wisinger D, Carlson R, Zou L, Nadir A. Cholestatic jaundice and IgA nephropathy induced by OTC muscle building agent superdrol. *Am J Gastroenterol* 2006;101:2659-62.
12. Kafrouni MI, Anders RA, Verma S. Hepatotoxicity associated with dietary supplements containing anabolic steroids. *Clin Gastroenterol Hepatol* 2007;5:809-12.
13. Anand JS, Chodorowski Z, Hajduk A, Waldman W. Cholestasis induced by parabolol successfully treated with the molecular adsorbent recirculating system. *ASAIO J* 2006;52:117-8.
14. Krishnan PV, Feng ZZ, Gordon SC. Prolonged intrahepatic cholestasis and renal failure secondary to anabolic androgenic steroid-enriched dietary supplements. *J Clin Gastroenterol* 2009;43:672-5.
15. Magee CD, Witte S, Kwok RM, Deuster PA. Mission Compromised? Drug-Induced Liver Injury From Prohormone Supplements Containing Anabolic-Androgenic Steroids in Two Deployed U.S. Service Members. *Mil Med* 2016;181:e1169-71.

16. Hymel BM, Victor DW, Alvarez L, Shores NJ, Balart LA. Mastabol induced acute cholestasis: A case report. *World J Hepatol* 2013;5:133-6.
17. Nasr J, Ahmad J. Severe cholestasis and renal failure associated with the use of the designer steroid Superdrol (methasteron): a case report and literature review. *Dig Dis Sci* 2009;54:1144-6.
18. Rosenfeld GA, Chang A, Poulin M, Kwan P, Yoshida E. Cholestatic jaundice, acute kidney injury and acute pancreatitis secondary to the recreational use of methandrostenolone: a case report. *J Med Case Rep* 2011;5:138.
19. Yoshida EM, Karim MA, Shaikh JF, Soos JG, Erb SR. At what price, glory? Severe cholestasis and acute renal failure in an athlete abusing stanozolol. *CMAJ* 1994;151:791-3.
20. Shah NL, Zacharias I, Khettry U, Afdhal N, Gordon FD. Methasteron-associated cholestatic liver injury: clinicopathologic findings in 5 cases. *Clin Gastroenterol Hepatol* 2008;6:255-8.
21. Sanchez-Osorio M, Duarte-Rojo A, Martinez-Benitez B, Torre A, Uribe M. Anabolic-androgenic steroids and liver injury. *Liver Int* 2008;28:278-82.
22. Singh V, Rudraraju M, Carey EJ, et al. Severe hepatotoxicity caused by a methasteron-containing performance-enhancing supplement. *J Clin Gastroenterol* 2009;43:287.
23. Stepien PM, Reczko K, Wieczorek A, et al. Severe intrahepatic cholestasis and liver failure after stanozolol usage - case report and review of the literature. *Clin Exp Hepatol* 2015;1:30-3.
24. Wree A, Dechene A, Herzer K, et al. Steroid and ursodesoxycholic Acid combination therapy in severe drug-induced liver injury. *Digestion* 2011;84:54-9.
25. Flores A, Nustas R, Nguyen HL, Rahimi RS. Severe Cholestasis and Bile Acid Nephropathy From Anabolic Steroids Successfully Treated With Plasmapheresis. *ACG Case Rep J* 2016;3:133-5.
26. El Khoury C, Sabbouh T, Farhat H, Ferzli A. Severe Cholestasis and Bile Cast Nephropathy Induced by Anabolic Steroids Successfully Treated with Plasma Exchange. *Case Rep Med* 2017;2017:4296474.
27. Luciano RL, Castano E, Moeckel G, Perazella MA. Bile acid nephropathy in a bodybuilder abusing an anabolic androgenic steroid. *Am J Kidney Dis* 2014;64:473-6.
28. Tabatabaee SM, Elahi R, Savaj S. Bile cast nephropathy due to cholestatic jaundice after using stanozolol in 2 amateur bodybuilders. *Iran J Kidney Dis* 2015;9:331-4.
29. Vilella AL, Limsuwat C, Williams DR, Seifert CF. Cholestatic jaundice as a result of combination designer supplement ingestion. *Ann Pharmacother* 2013;47:e33.
