# Supplementary material for: Androgenic anabolic steroid-induced liver injury: two case reports assessed for causality by the updated Roussel Uclaf Causality Assessment Method (RUCAM) score and a comprehensive review of the literature
Source: PubMed Central journal article supplement (PMC7678230; doi:10.1136/bmjgast-2020-000549), 2020-11-19
Supplement: bmjgast-2020-000549supp002.pdf [file bmjgast-2020-000549supp002.pdf]

Supplemental Table 2: Comparison of current series and the Spanish/South-American series of Robles-Diaz *et al.*

|                                        | Current series (Abeles RD) | Robles-Diaz <sup>1</sup> |
|----------------------------------------|----------------------------|--------------------------|
| Number of cases                        | 52                         | 25                       |
| Age                                    | 29                         | 31                       |
| Male                                   | 50 (96%)                   | 25 (100%)                |
| Days from starting AAS to presentation | 56                         | 49                       |
| Bilirubin umol/L                       | 314                        | 241                      |
| ALT IU/L                               | 125                        | 784                      |
| ALP IU/L                               | 190                        | 191                      |
| Renal dysfunction                      | 22 (43%)                   | 6 (24%)                  |

AAS Androgenic Anabolic Steroid, ALT Alanine transferase, ALP Alkaline Phosphatase

1. Robles-Diaz M, Gonzalez-Jimenez A, Medina-Caliz I, et al. Distinct phenotype of hepatotoxicity associated with illicit use of anabolic androgenic steroids. *Aliment Pharmacol Ther* 2015;41:116-25.
